# Supplementary material
Source: Copernicus journal article supplement (doi:10.5194/jm-45-259-2026)
Supplement: Supplementary file 1 [file jm-45-259-2026-supplement.pdf]

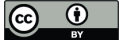

*Supplement of*

**New material of *Schizopholis* (family Botsfordiidae) from the Tsinghsutung Formation (Cambrian Series 2, Stage 4) in Songtao County, Guizhou Province, South China**

**Buqing Wei et al.**

*Correspondence to:* Xinglian Yang ([yangxinglian2002@163.com](mailto:yangxinglian2002@163.com))

The copyright of individual parts of the supplement might differ from the article licence.

1 Table S1. The specimen numbers, SEM stub numbers, and Lab inventory numbers of  
 2 *Schizopholis yorkensis* from the Tsingsutung Formation.

| D | Specimen numbers | SEM stub numbers | Lab inventory numbers |
|---|------------------|------------------|-----------------------|
| E | PX-15m-24        | B5-3-02          | GZU-B-2333            |
| E | PX-15m-188       | B5-3-05          | GZU-B-2497            |
| E | PX-15m-189       | B5-3-06          | GZU-B-2498            |
| E | PX-14m-202       | B5-10-11         | GZU-B-2244            |
| E | PX-15m-270       | B6-2-01          | GZU-B-2579            |
| E | PX-15m-390       | B6-8-08          | GZU-B-2699            |
| E | PX-15m-391       | B6-8-09          | GZU-B-2700            |
| E | PX-15m-394       | B6-8-12          | GZU-B-2703            |
| E | PX-15m-395       | B6-8-13          | GZU-B-2704            |
| E | PX-15m-396       | B6-8-14          | GZU-B-2705            |
| E | PX-15m-400       | B6-8-18          | GZU-B-2709            |
| E | PX-15m-401       | B6-8-19          | GZU-B-2710            |
| E | PX-15m-402       | B6-8-20          | GZU-B-2711            |
| E | PX-15m-409       | B6-8-27          | GZU-B-2718            |
| E | PX-15m-415       | B6-8-33          | GZU-B-2724            |
| E | PX-15m-420       | B6-8-38          | GZU-B-2729            |
| E | PX-15m-615       | B6-13-01         | GZU-B-2924            |
| I | PX-15m-23        | B5-3-01          | GZU-B-2332            |
| I | PX-14m-45        | B5-12-25         | GZU-B-2087            |
| I | PX-14m-225       | B5-13-03         | GZU-B-2267            |
| I | PX-15m-397       | B6-8-15          | GZU-B-2706            |
| I | PX-15m-408       | B6-8-26          | GZU-B-2717            |
| I | PX-15m-410       | B6-8-28          | GZU-B-2719            |
| I | PX-15m-419       | B6-8-37          | GZU-B-2728            |
| I | PX-15m-421       | B6-8-39          | GZU-B-2730            |
| V | Specimen numbers | SEM stub numbers | Lab inventory numbers |
| E | PX-15m-25        | B5-3-03          | GZU-B-2334            |
| E | PX-15m-135       | B5-4-08          | GZU-B-2444            |
| E | PX-14m-189       | B5-9-14          | GZU-B-2231            |
| E | PX-14m-220       | B5-10-29         | GZU-B-2262            |
| H | PX-14m-43        | B5-12-23         | GZU-B-2085            |
| H | PX-15m-351       | B6-6-03          | GZU-B-2660            |
| E | PX-15m-367       | B6-7-02          | GZU-B-2676            |
| E | PX-15m-383       | B6-8-01          | GZU-B-2692            |
| E | PX-15m-389       | B6-8-07          | GZU-B-2698            |
| E | PX-15m-392       | B6-8-10          | GZU-B-2701            |
| E | PX-15m-403       | B6-8-21          | GZU-B-2712            |
| E | PX-15m-404       | B6-8-22          | GZU-B-2713            |
| E | PX-15m-405       | B6-8-23          | GZU-B-2714            |
| E | PX-15m-625       | B6-13-11         | GZU-B-2934            |
| E | PX-15m-626       | B6-13-12         | GZU-B-2935            |

|   |            |          |            |
|---|------------|----------|------------|
| I | PX-14m-201 | B5-10-10 | GZU-B-2243 |
| I | PX-15m-275 | B6-2-06  | GZU-B-2584 |
| I | PX-15m-276 | B6-2-07  | GZU-B-2585 |
| I | PX-15m-384 | B6-8-02  | GZU-B-2693 |
| I | PX-15m-386 | B6-8-04  | GZU-B-2695 |
| I | PX-15m-393 | B6-8-11  | GZU-B-2702 |
| I | PX-15m-398 | B6-8-16  | GZU-B-2707 |
| I | PX-15m-406 | B6-8-24  | GZU-B-2715 |
| I | PX-15m-411 | B6-8-29  | GZU-B-2720 |
| I | PX-15m-414 | B6-8-32  | GZU-B-2723 |

- 3 Abbreviations: D–Dorsal valve; V–Ventral valve; SEM–Scanning electron microscopy; Lab–Laboratory;  
4 E–exterior view; I–interior view; H–hinged ventral and dorsal valves; PX–Panxin section; B5–number 5  
5 of SEM samples box; B6–number 6 of SEM samples box; GZU–Guizhou University; B–Brachiopods.

6 Table S2. Measurements of dorsal valves of *Schizopholis yorkensis* from the Tsinghsutung  
7 Formation in Songtao County, Guizhou Province, South China.

| Specimen numbers | $L$ | $W$  | $W/L$ | $L_m$ | $L_m/L$ | $W_m$ | $W_m/W$ | $W_m/L_m$ | $L_{tu}$ | $L_{tu}/L_m$ | $W_{tu}$ | $W_{tu}/W_m$ |
|------------------|-----|------|-------|-------|---------|-------|---------|-----------|----------|--------------|----------|--------------|
| PX-15m-24        | 769 | 845  | 1.10  | 331   | 0.43    | 428   | 0.51    | 1.30      | 62       | 0.19         | 99       | 0.23         |
| PX-15m-188       | 508 | 569  | 1.12  | 333   | 0.66    | 453   | 0.80    | 1.36      | 77       | 0.23         | 98       | 0.22         |
| PX-15m-189       | 573 | 619  | 1.08  | 357   | 0.62    | 430   | 0.70    | 1.20      | 124      | 0.35         | 130      | 0.30         |
| PX-14m-202       | 634 | 640  | 1.01  | 367   | 0.58    | 455   | 0.71    | 1.24      | 112      | 0.30         | 127      | 0.28         |
| PX-15m-270       | /   | 1568 | /     | 292   | /       | 484   | 0.31    | 1.66      | 54       | 0.18         | 132      | 0.27         |
| PX-15m-390       | 819 | 841  | 1.03  | 334   | 0.41    | 473   | 0.56    | 1.42      | 117      | 0.35         | 115      | 0.24         |
| PX-15m-391       | 883 | 900  | 1.02  | 270   | 0.31    | 454   | 0.50    | 1.68      | /        | /            | 134      | 0.30         |
| PX-15m-394       | 621 | 660  | 1.06  | 400   | 0.64    | 495   | 0.75    | 1.24      | 123      | 0.31         | 149      | 0.30         |
| PX-15m-395       | 732 | 770  | 1.05  | 369   | 0.50    | 526   | 0.68    | 1.43      | 73       | 0.20         | 161      | 0.31         |
| PX-15m-396       | 851 | 1018 | 1.20  | 379   | 0.45    | 470   | 0.46    | 1.24      | 87       | 0.23         | 119      | 0.25         |
| PX-15m-400       | 469 | 802  | 1.71  | 408   | 0.87    | 509   | 0.64    | 1.25      | 141      | 0.35         | 151      | 0.30         |
| PX-15m-401       | 537 | 572  | 1.07  | 275   | 0.51    | 390   | 0.68    | 1.42      | 59       | 0.21         | 116      | 0.30         |
| PX-15m-402       | 302 | 287  | 0.95  | 236   | 0.78    | 285   | 0.99    | 1.21      | 60       | 0.25         | 82       | 0.29         |
| PX-15m-409       | 756 | 743  | 0.98  | 377   | 0.50    | 495   | 0.67    | 1.31      | 104      | 0.28         | 145      | 0.29         |
| PX-15m-415       | /   | /    | /     | /     | /       | 450   | /       | /         | /        | /            | 122      | 0.27         |
| PX-15m-420       | /   | /    | /     | 372   | /       | 499   | /       | 1.34      | 95       | 0.25         | 132      | 0.27         |
| PX-15m-615       | 592 | 730  | 1.23  | 337   | 0.57    | 465   | 0.64    | 1.38      | /        | /            | 139      | 0.30         |

8 Abbreviations:  $L$ —length of valve,  $W$ —width of valve,  $L_m$ —length of metamorphic shell,  $W_m$ —width of  
9 metamorphic shell,  $L_{tu}$ —length of the tubercle to the posterior margin,  $W_{tu}$ —width between two tubercles.

10 Table S3. Measurements of ventral valves of *Schizopholis yorkensis* from the Tsinghsutung  
11 Formation in Songtao County, Guizhou Province, South China.

| Specimen numbers | $L$  | $W$  | $W/L$ | $L_m$ | $L_m/L$ | $W_m$ | $W_m/W$ | $W_m/L_m$ |
|------------------|------|------|-------|-------|---------|-------|---------|-----------|
| PX-15m-25        | 1036 | 1240 | 1.20  | 346   | 0.33    | 516   | 0.42    | 1.49      |
| PX-15m-135       | 1015 | 988  | 0.97  | 393   | 0.39    | 461   | 0.47    | 1.17      |
| PX-14m-189       | 737  | 818  | 1.11  | 345   | 0.47    | 515   | 0.63    | 1.49      |
| PX-14m-220       | 1197 | 1462 | 1.22  | 361   | 0.30    | 407   | 0.28    | 1.13      |
| PX-14m-43        | 570  | 634  | 1.11  | 354   | 0.62    | 435   | 0.69    | 1.23      |
| PX-15m-351       | 1856 | 1918 | 1.03  | 364   | 0.20    | 434   | 0.23    | 1.19      |
| PX-15m-367       | 831  | 1053 | 1.27  | 370   | 0.45    | 509   | 0.48    | 1.38      |
| PX-15m-383       | 549  | 662  | 1.21  | 383   | 0.70    | 516   | 0.78    | 1.35      |
| PX-15m-389       | 816  | 1047 | 1.28  | 351   | 0.43    | 516   | 0.49    | 1.47      |
| PX-15m-392       | 712  | 867  | 1.22  | 353   | 0.50    | 397   | 0.46    | 1.13      |
| PX-15m-403       | 681  | 646  | 0.95  | 411   | 0.60    | 508   | 0.79    | 1.24      |
| PX-15m-404       | 657  | 632  | 0.96  | 399   | 0.61    | 482   | 0.76    | 1.21      |
| PX-15m-405       | 751  | 674  | 0.90  | 318   | 0.42    | 419   | 0.62    | 1.32      |
| PX-15m-625       | 1107 | 1529 | 1.38  | 386   | 0.35    | 469   | 0.31    | 1.22      |
| PX-15m-626       | 1130 | 1512 | 1.34  | 459   | 0.41    | 580   | 0.38    | 1.26      |

12 Abbreviations see Table S2.
